# Supplementary material for: Electrosprayed Agar Nanocapsules as Edible Carriers of Bioactive Compounds
Source: MDPI journal article supplement (doi:10.3390/foods11142093), 2022-07-14
Supplement: s1 [file s1]

Supplementary Materials

# Electrosprayed Agar Nanocapsules as Edible Carriers of Bioactive Compounds

Barbara Tomadoni <sup>1</sup>, María José Fabra <sup>2,3</sup>, Daniel Alexander Méndez <sup>2,4</sup>, Antonio Martínez-Abad <sup>2,3</sup> and Amparo López-Rubio <sup>2,3,\*</sup>

<sup>1</sup> Grupo de Materiales Compuestos Termoplásticos (CoMP), Instituto de Investigaciones en Ciencia y Tecnología de Materiales (INTEMA), Universidad Nacional de Mar del Plata (UNMdP) y Consejo Nacional de Investigaciones Científicas y Técnicas (CONICET), Av. Colón 10850, Mar del Plata 7600, Argentina; btomadoni@gmail.com

<sup>2</sup> Packaging Group, Food Safety and Preservation Department, Institute of Agrochemistry and Food Technology (IATA-CSIC), Catedrático Agustín Escardino Benlloch 7, 46980 Paterna, Spain; mjfabra@iata.csic.es (M.J.F.); daamendezre@iata.csic.es (D.A.M.); conaba@iata.csic.es (A.M.-A.)

<sup>3</sup> Interdisciplinary Platform for Sustainable Plastics towards a Circular Economy-Spanish National Research Council (SusPlast-CSIC), 26006 Madrid, Spain

<sup>4</sup> Grupo de Investigación Biocono, Facultad de Ciencias Económicas y Administrativas, Universidad del Tolima, 730006299, Tolima, Colombia

\* Correspondence: amparo.lopez@iata.csic.es

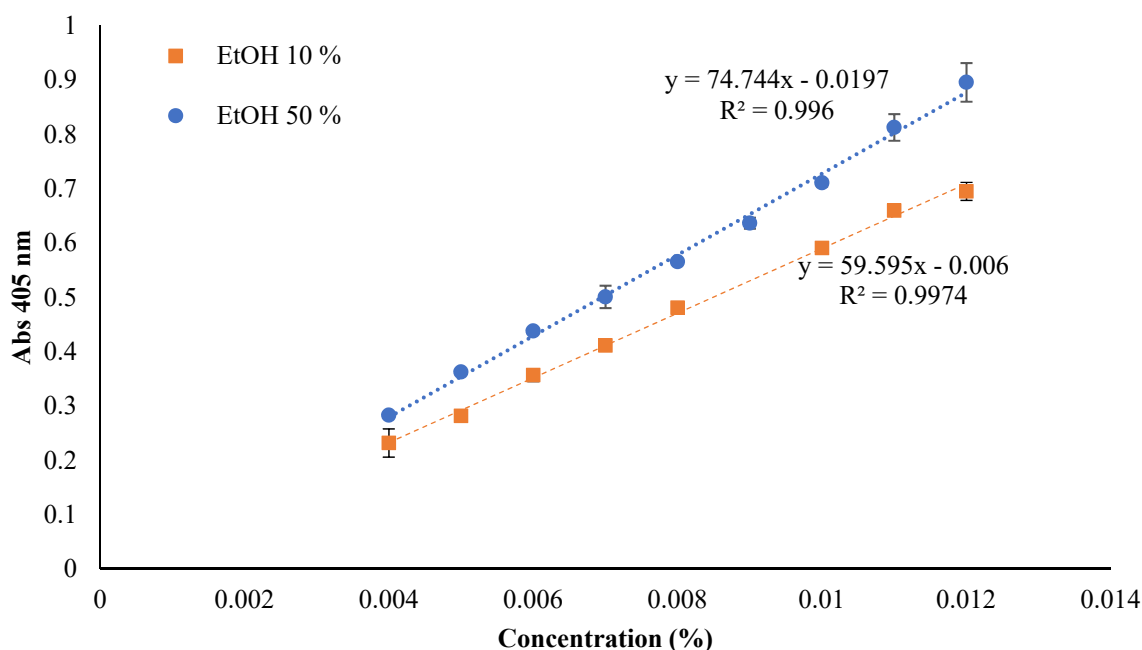

Figure S1. Chlorophyllin calibration curves in EtOH at 10 and 50% v/v.

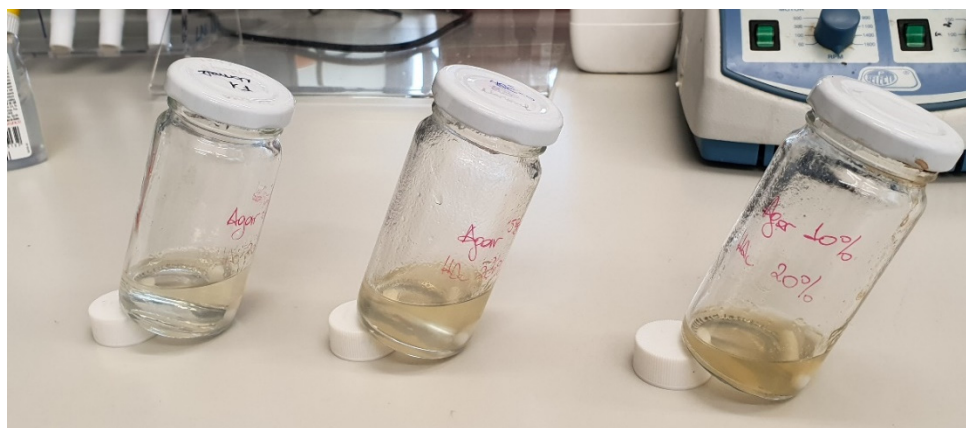

**Figure S2.** Agar solutions (from left to right: 2.5, 5.0 and 10.0% *w/v*) in HAc 20% *v/v*.

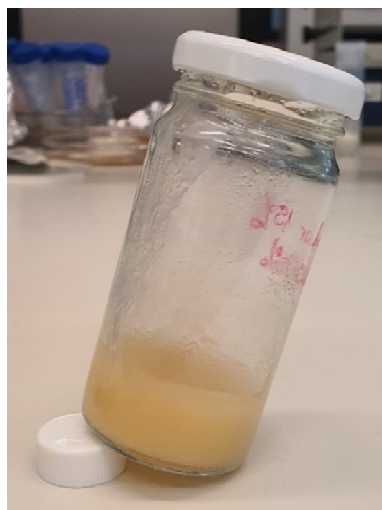

**Figure S3.** Agar 15 % *w/v* in HAc 20 % *v/v*.

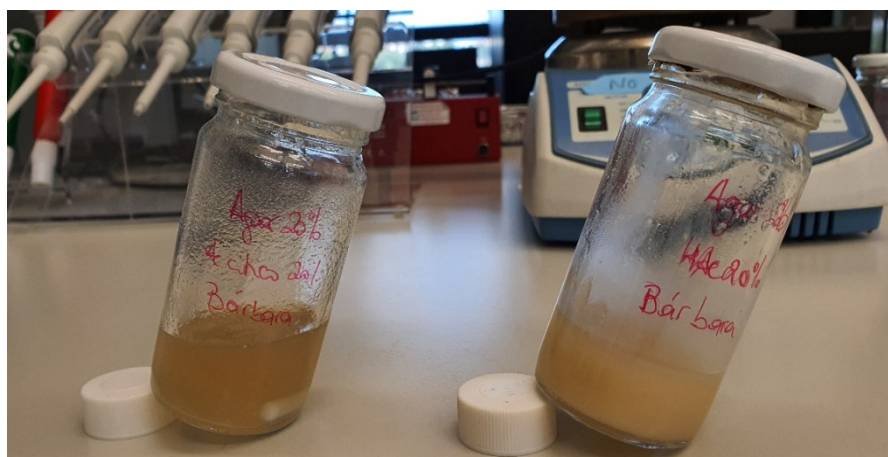

**Figure S4.** Evaluation of citric acid (left) and acetic acid (right) for the dissolution of agar 20% *w/v*.

**Table S1.** Mw weight average, Mn Number average and PDI polydispersity index, for agar samples prepared under different conditions.

| <i>Sample</i>          | <b>Mn</b> | <b>Mw</b> | <b>PDI</b> |
|------------------------|-----------|-----------|------------|
| <i>Agar10%HAc20%</i>   | 2.27      | 4.70      | 2.07       |
| <i>Agar15%HAc30%</i>   | 2.29      | 5.52      | 2.27       |
| <i>Agar20%HAc40%</i>   | 2.23      | 5.49      | 2.45       |
| <i>Agar15%HAc40%</i>   | 2.26      | 5.56      | 2.45       |
| <i>Agar10%HAc40%</i>   | 1.68      | 3.83      | 2.27       |
| <i>Agar10% - water</i> | 7.92      | 20.75     | 2.46       |

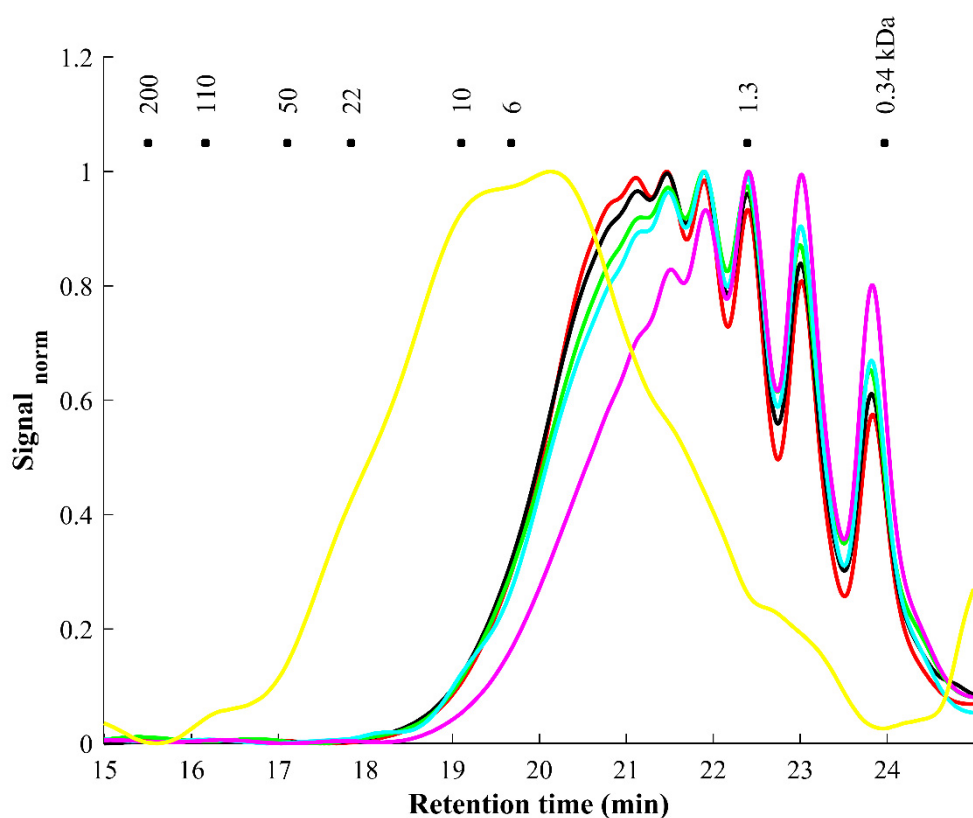**Figure S5.** Molecular weight distribution of the agar solutions: Agar10%HAc20% (■), Agar15%HAc30% (■), Agar20%HAc40% (■), Agar15%HAc40% (■), Agar10%HAc40% (■) and Agar10%-water (■). The black squares correspond to pullulan standards with the matching molecular weight.
